# Supplementary material for: Preparation of Pt–Tl clusters showing new geometries. X-ray, NMR and luminescence studies
Source: Royal Society of Chemistry journal article supplement (doi:10.1039/c4dt00536h), 2014-01-01
Supplement: c4dt00536h1.pdf [file c4dt00536h1.pdf]

## **Preparation of Pt–Tl Clusters Showing New Geometries. X-ray, NMR and Luminescence Studies**

**Úrsula Belío, Sara Fuertes<sup>†</sup> and Antonio Martín\***

*Instituto de Síntesis Química y Catálisis Homogénea (ISQCH). Departamento de Química Inorgánica. Universidad de Zaragoza – CSIC. 50009 Zaragoza, Spain.*

<sup>†</sup> *ARAID Researcher*

**SUPPLEMENTARY INFORMATION**

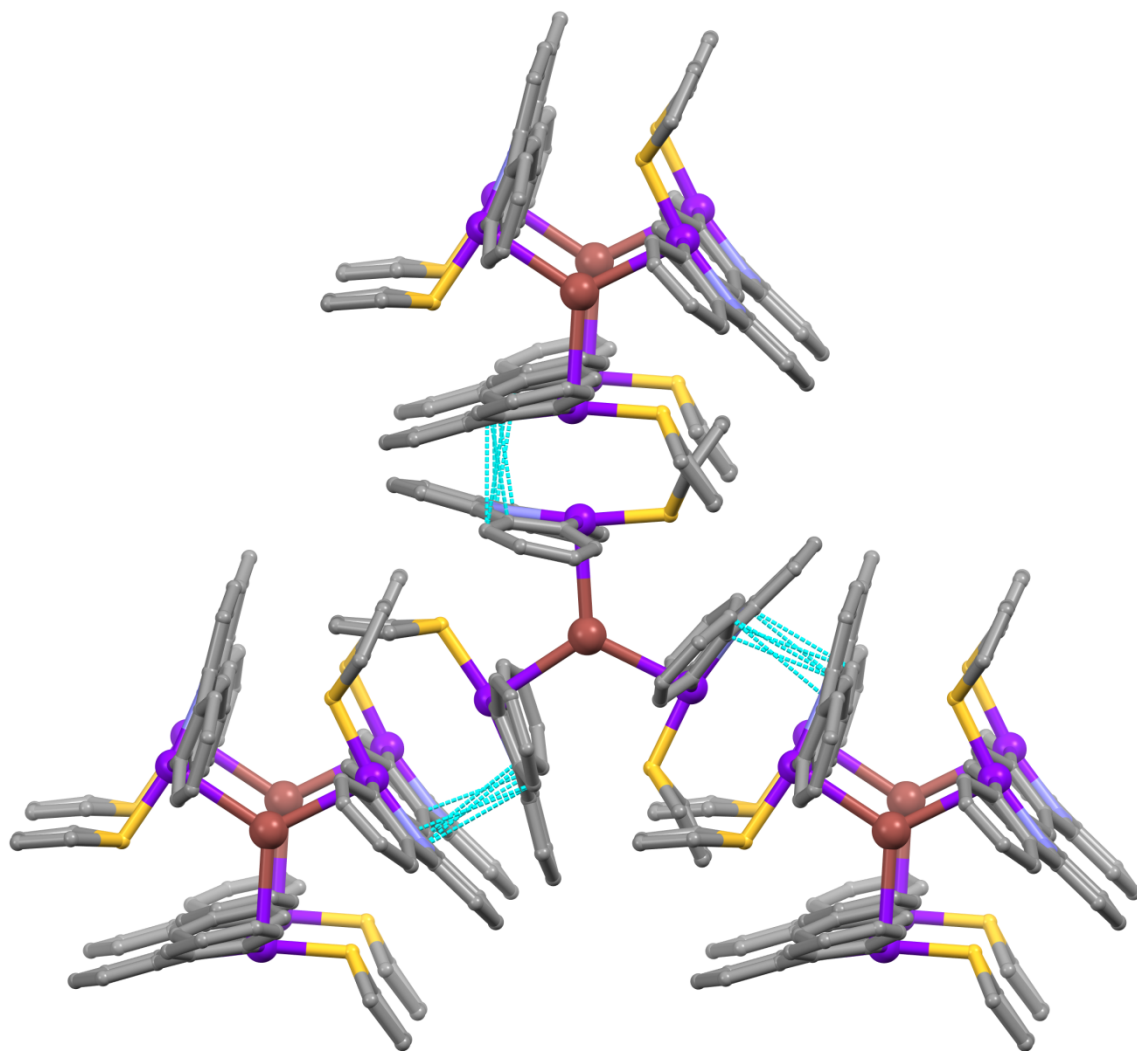

a

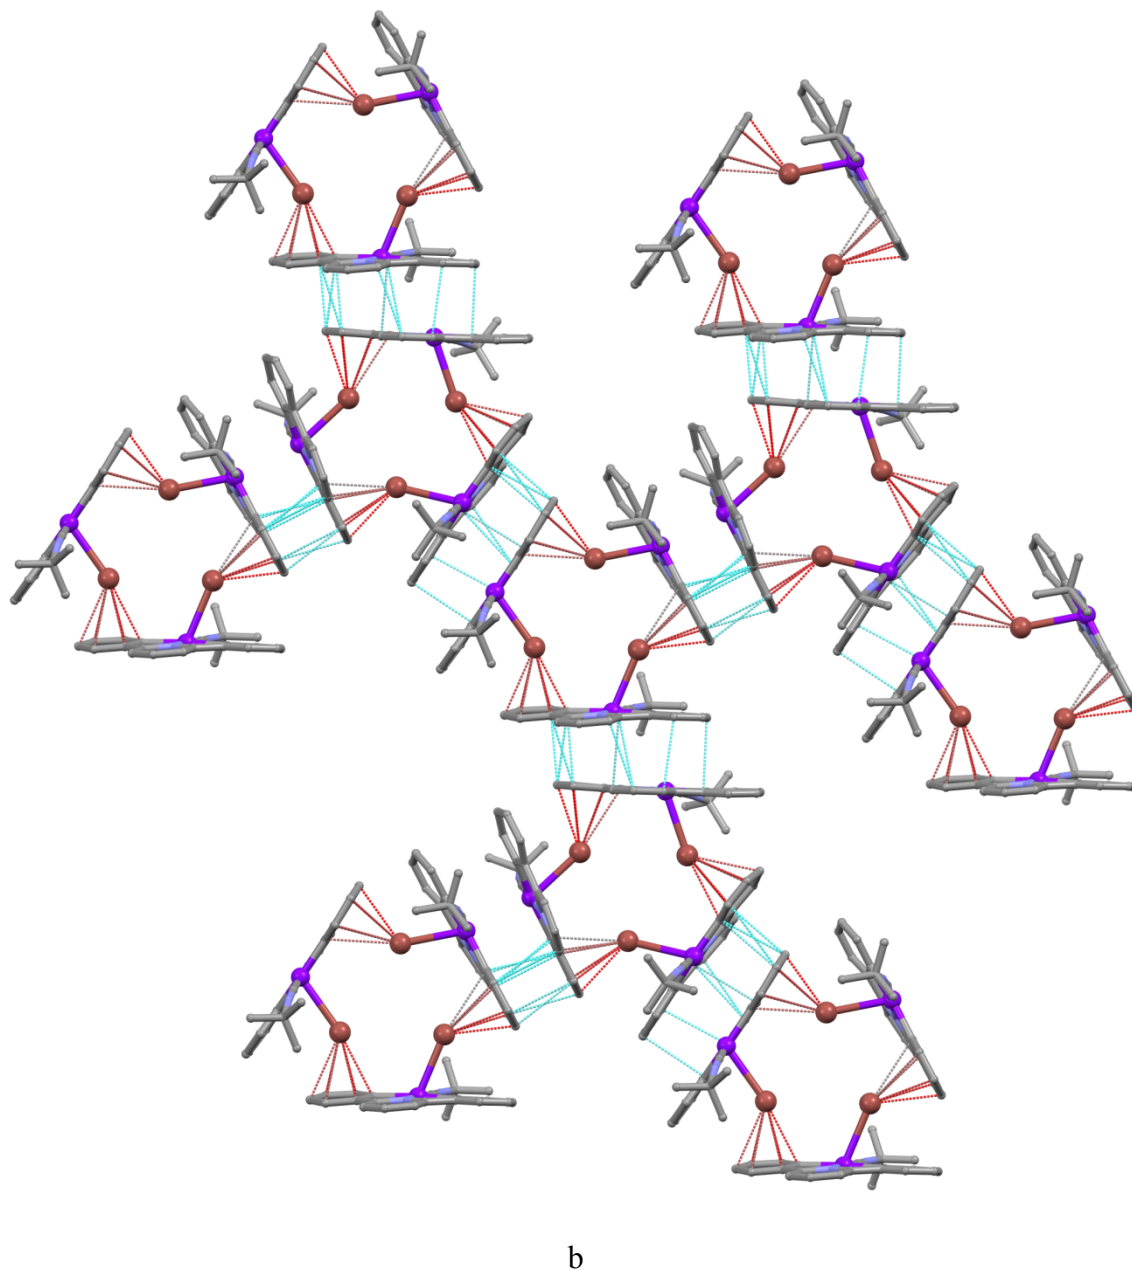

Figure S1. Supramolecular arrangement of the cations of complex **3** (a) and **4** (b). The cyan lines show the intermolecular  $\pi \cdots \pi$  interactions.

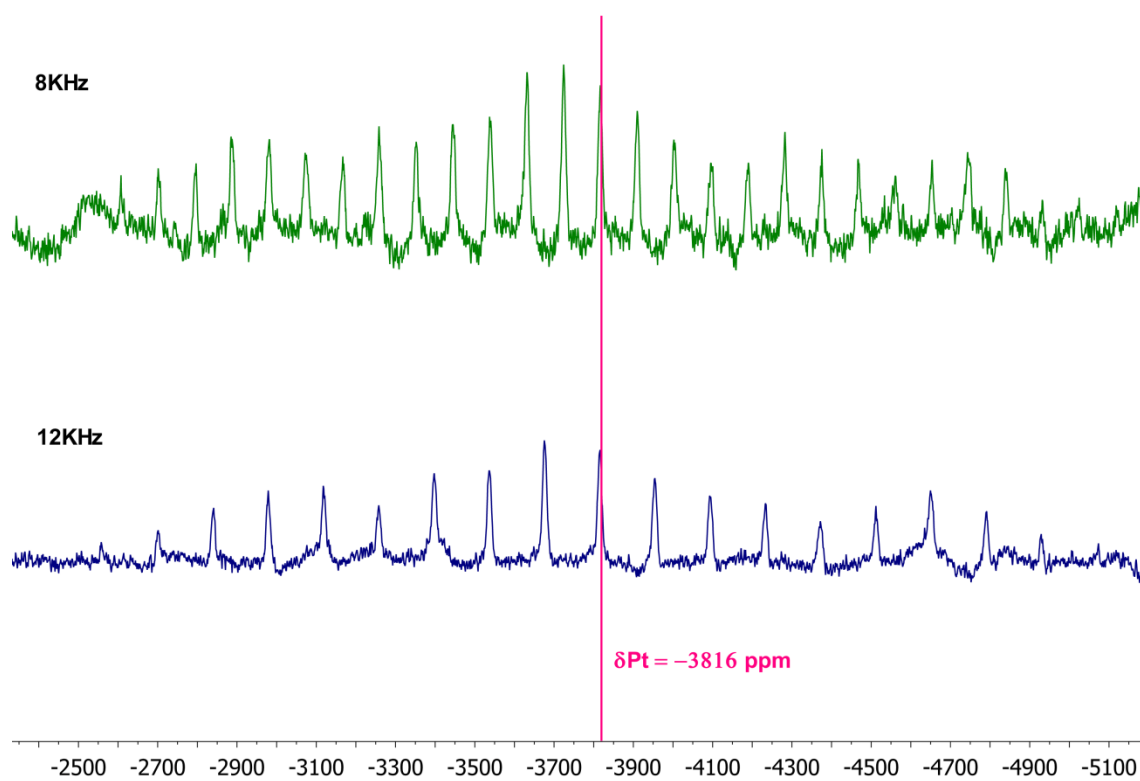

Figure S2. Solid state  $^{195}\text{Pt}$  NMR spectra of compound **1** registered at spinning speeds of 8 and 12 kHz.

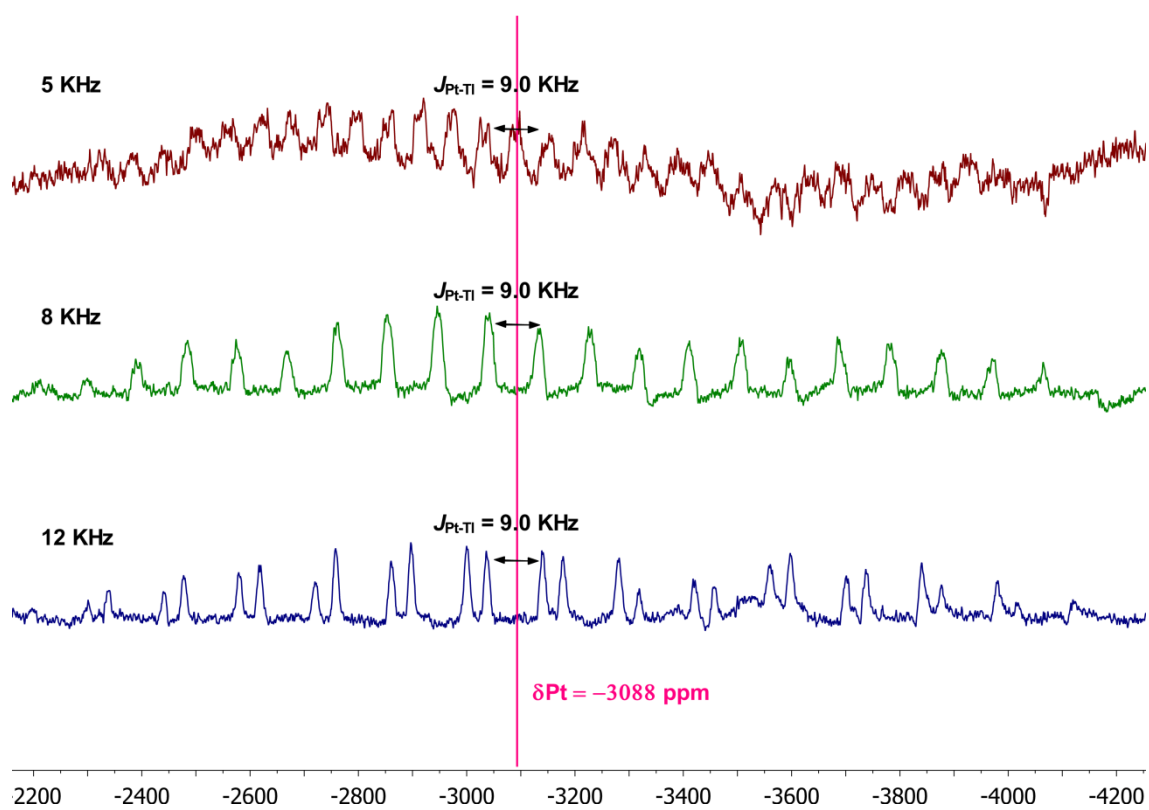

Figure S3. Solid state  $^{195}\text{Pt}$  NMR spectra of compound **3** registered at spinning speeds of 5, 8 and 12 kHz.

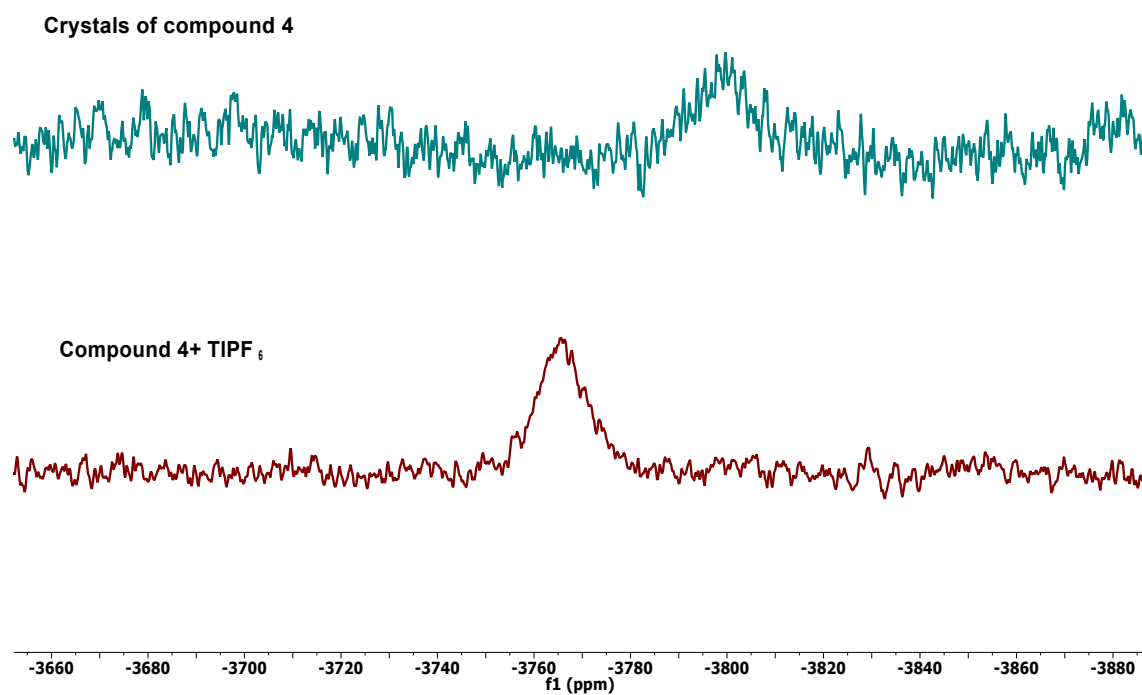

Figure S4.  $^{195}\text{Pt}$  NMR spectra of crystals of compound **4** and **4** + TlPF<sub>6</sub> exc. in CD<sub>2</sub>Cl<sub>2</sub> at room temperature.

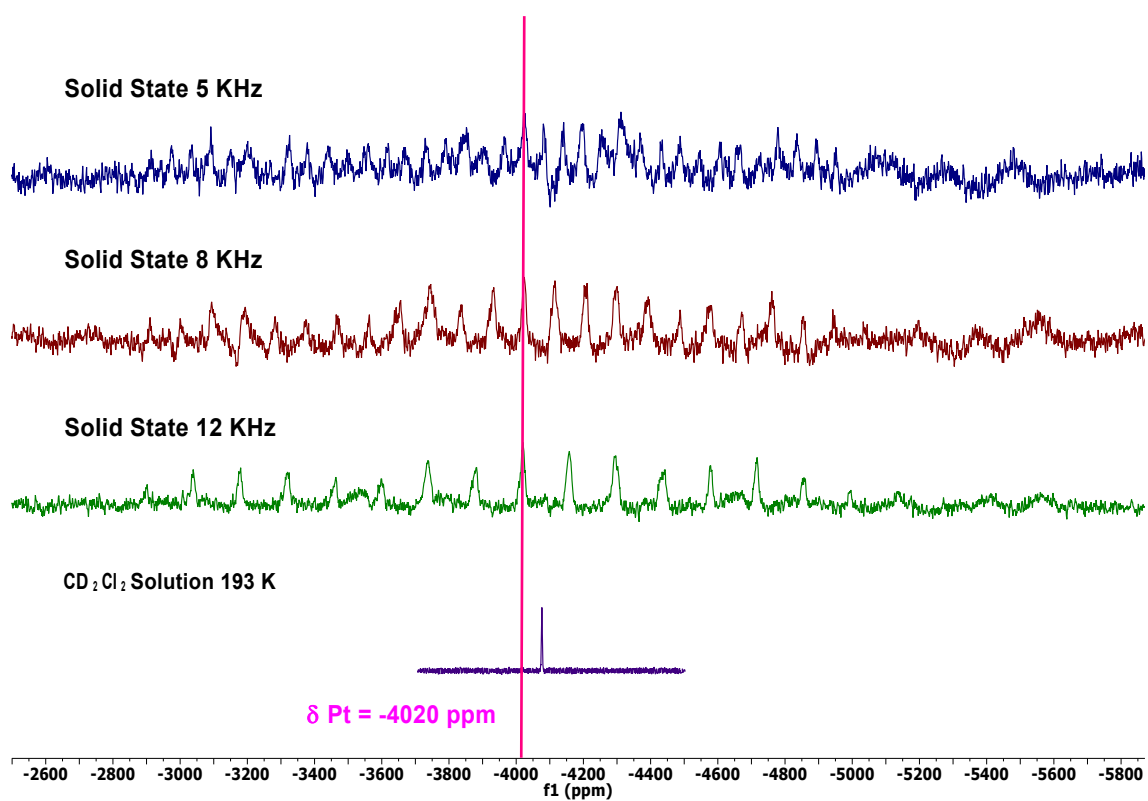

Figure S5. Solid state  $^{195}\text{Pt}$  NMR spectra of compound **2** registered at spinning speeds of 5, 8 and 12 kHz. and  $^{195}\text{Pt}$  NMR spectra of compound **2** in  $\text{CD}_2\text{Cl}_2$  at 193K.

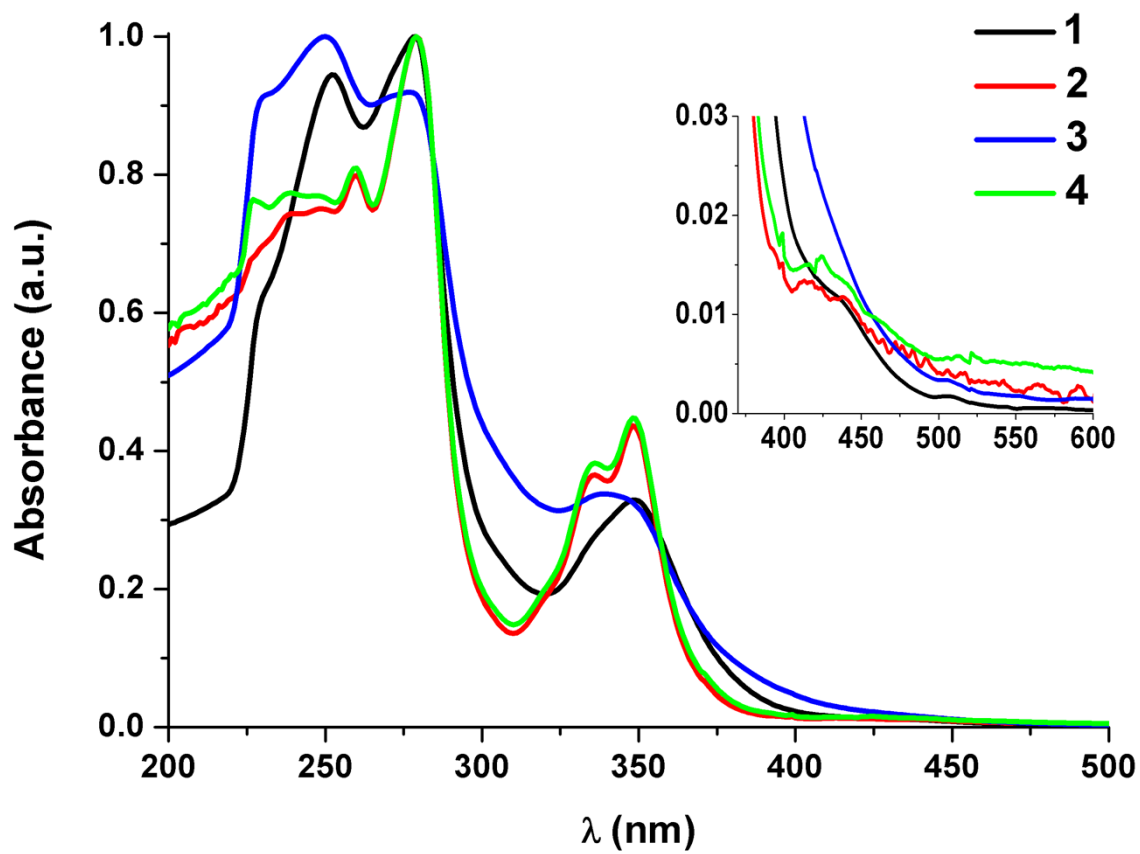

Figure S6. Normalized UV-Vis absorption spectra of **1-4** in  $\text{CH}_2\text{Cl}_2$  at 298 K



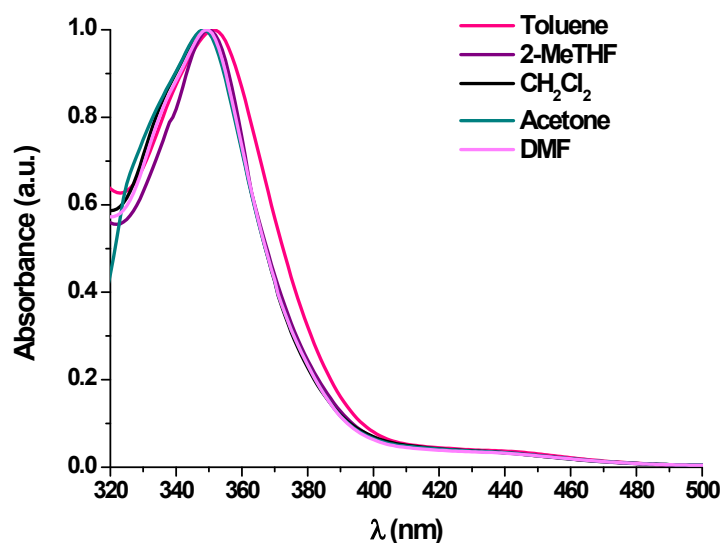

Figure S7. Normalized UV-vis spectra of **1** in different solvents

Table S1. Absorption data for **1-4** in solid state and in solution ( $10^{-5}\text{M}$ ) at 298K.

| Comp.    | Media                    | $\lambda_{\text{abs}} / \text{nm}$ ( $10^3 \epsilon \text{ M}^{-1} \text{ cm}^{-1}$ ) |
|----------|--------------------------|---------------------------------------------------------------------------------------|
| <b>1</b> | Solid                    | 278, 351, 436, 509                                                                    |
|          | Toluene                  | 282 (34.1), 304 (9.1), 351 (12.1), 441 (0.3)                                          |
|          | 2-Me-THF                 | 271 (105.5), 303 (34.2), 351 (35.5), 436 (1.3)                                        |
|          | $\text{CH}_2\text{Cl}_2$ | 281 (27.6), 300 (20.8), 334 (13.3), 348 (16.2), 435 (0.2)                             |
|          | Acetone                  | 348 (13.6), 438 (0.3)                                                                 |
|          | DMF                      | 277 (36.5), 349 (11.9), 434 (0.4)                                                     |
| <b>2</b> | Solid                    | 277, 345, 416, 439, 514                                                               |
|          | Toluene                  | 285 (44.4), 338 (19.1), 350 (22.4), 420 (0.7), 443 (0.5)                              |
|          | 2-Me-THF                 | 290 (25.8), 322 (11.9), 336 (16.5), 350 (19.2), 418 (0.6), 442 (0.4)                  |
|          | $\text{CH}_2\text{Cl}_2$ | 279 (43.7), 318 (6.8), 336 (15.4), 348 (18.7), 414 (0.3), 439 (0.2)                   |
|          | Acetone                  | 319 (26.6), 336 (16.7), 346 (19.8), 417 (0.5), 437 (0.4)                              |
|          | DMF                      | 279 (37.1), 319 (7.5), 335 (14.3), 347 (17.0), 417 (0.4), 436(0.3)                    |
| <b>3</b> | Solid                    | 277, 347, 432, 512                                                                    |
|          | Toluene                  | 284 (76.9), 306 (24.7), 352 (33.0), 440 (1.6)                                         |
|          | 2-Me-THF                 | 281 (98.6), 339 (32.3), 351 (36.5), 437 (1.4)                                         |
|          | $\text{CH}_2\text{Cl}_2$ | 277 (106.3), 341 (38.6), 430 (0.3)                                                    |
|          | Acetone                  | 348 (41.4), 435 (1.1)                                                                 |
|          | DMF                      | 279 (117.8), 338 (33.9), 349 (39.0), 434 (1.3)                                        |
| <b>4</b> | Solid                    | 277, 344, 419, 443, 520                                                               |
|          | Toluene                  | 285 (39.9), 312 (14.8), 338 (18.9), 350 (21.4), 418 (0.6), 441 (0.5)                  |
|          | 2-Me-THF                 | 278 (63.5), 310 (11.9), 336 (17.9), 349 (18.7), 416 (0.9), 441 (0.8)                  |
|          | $\text{CH}_2\text{Cl}_2$ | 278 (37.8), 335 (13.6), 348 (16.2), 413 (0.4), 438 (0.3)                              |
|          | Acetone                  | 336 (17.6), 346 (23.1), 416 (0.6), 438 (0.5)                                          |
|          | DMF                      | 278 (42.5), 334 (16.1), 347 (18.9), 416 (0.5), 438 (0.4)                              |

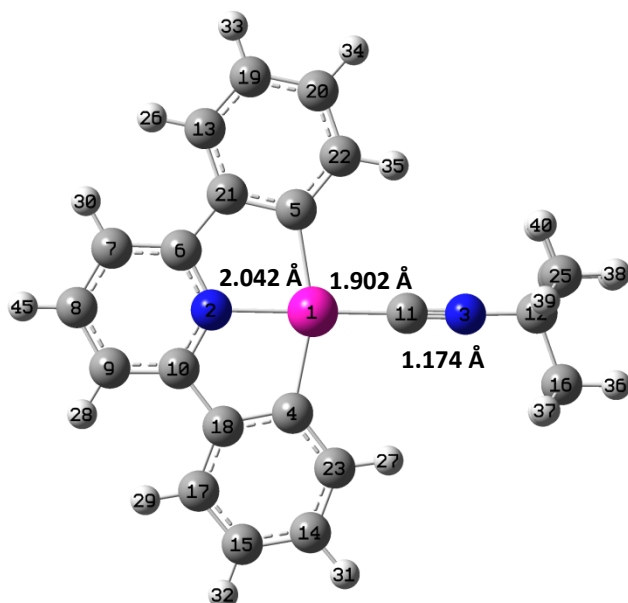Figure S8. DFT-Optimized structure of [Pt(CNC)(CN'Bu)] (**2**)Table S2. DFT-Optimized coordinates of **2**, in the Ground State,  $S_0$ 

| Center | Coordinates (Angstroms) |           |           |
|--------|-------------------------|-----------|-----------|
|        | X                       | Y         | Z         |
| Pt     | 0.042705                | -0.011545 | 0.005030  |
| N      | -1.998753               | 0.041599  | -0.000999 |
| N      | 3.118132                | -0.084148 | 0.008046  |
| C      | -0.381043               | -2.056951 | 0.002927  |
| C      | -0.272536               | 2.054699  | 0.003920  |
| C      | -2.597777               | 1.252690  | -0.003662 |
| C      | -3.991660               | 1.303603  | -0.008549 |
| C      | -4.706232               | 0.111583  | -0.010364 |
| C      | -4.054552               | -1.116149 | -0.007560 |
| C      | -2.659994               | -1.136763 | -0.002860 |
| C      | 1.943992                | -0.057842 | 0.007849  |
| C      | 4.557515                | -0.071861 | -0.006454 |
| C      | -2.096286               | 3.706748  | -0.003624 |
| C      | -0.042791               | -4.472775 | 0.002329  |
| C      | -1.416890               | -4.698562 | -0.000150 |
| C      | 5.045436                | -1.515084 | -0.085062 |
| C      | -2.285507               | -3.615380 | -0.001664 |
| C      | -1.781288               | -2.312250 | -0.000294 |
| C      | -1.174568               | 4.745069  | -0.001139 |
| C      | 0.186647                | 4.451240  | 0.003991  |
| C      | -1.658589               | 2.380036  | -0.001134 |
| C      | 0.623283                | 3.127029  | 0.006526  |
| C      | 0.459751                | -3.172339 | 0.003747  |
| C      | 5.006927                | 0.723482  | -1.228574 |
| C      | 5.035490                | 0.595943  | 1.279431  |
| H      | -3.162480               | 3.937919  | -0.007558 |

|   |           |           |           |
|---|-----------|-----------|-----------|
| H | 1.542460  | -3.028627 | 0.005301  |
| H | -4.619579 | -2.044642 | -0.009194 |
| H | -3.362219 | -3.791349 | -0.003956 |
| H | -4.506973 | 2.260682  | -0.010999 |
| H | 0.643262  | -5.320164 | 0.003180  |
| H | -1.809653 | -5.713957 | -0.001074 |
| H | -1.515643 | 5.778962  | -0.003145 |
| H | 0.914565  | 5.263003  | 0.006081  |
| H | 1.697670  | 2.928355  | 0.010859  |
| H | 6.142815  | -1.533925 | -0.102491 |
| H | 4.700496  | -2.090629 | 0.782957  |
| H | 6.132518  | 0.631377  | 1.288726  |
| H | 4.697024  | 0.035862  | 2.159637  |
| H | 4.651785  | 1.621361  | 1.350842  |
| H | 4.673387  | -2.001402 | -0.995373 |
| H | 4.628322  | 1.752335  | -1.182097 |
| H | 6.103550  | 0.755680  | -1.264066 |
| H | 4.640838  | 0.260102  | -2.152851 |
| H | -5.794733 | 0.140437  | -0.014211 |

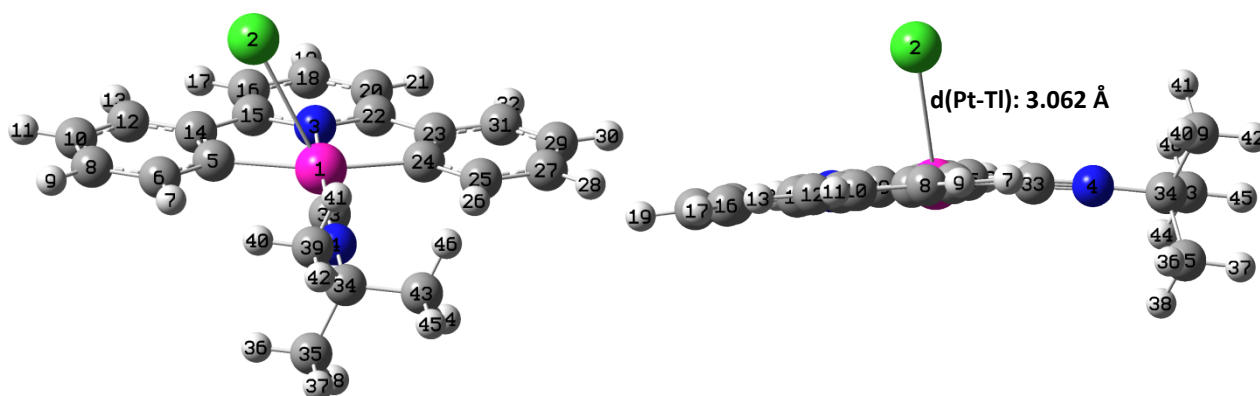

Figure S9. DFT-Optimized structure of  $[\text{Pt}(\text{CNC})(\text{CN}'\text{Bu})\text{TI}]^+$  ( $\mathbf{4}'$ )

Table S3. DFT-Optimized coordinates of  $\mathbf{4}'$ , in the Ground State,  $S_0$

| Center | Coordinates (Angstroms) |           |           |
|--------|-------------------------|-----------|-----------|
|        | X                       | Y         | Z         |
| Pt     | 0.253050                | 0.414867  | -0.483461 |
| Tl     | -0.720046               | -1.475510 | 1.719763  |
| N      | -1.667720               | 1.095859  | -0.609456 |
| N      | 3.232390                | -0.441840 | -0.493270 |
| C      | -0.751161               | -1.356202 | -1.105919 |
| C      | -0.283020               | -2.654486 | -1.343623 |
| H      | 0.782897                | -2.869229 | -1.232989 |
| C      | -1.140651               | -3.684921 | -1.736837 |
| H      | -0.744997               | -4.682914 | -1.919276 |
| C      | -2.501647               | -3.438181 | -1.893345 |
| H      | -3.173042               | -4.239730 | -2.193260 |
| C      | -3.004223               | -2.160611 | -1.670531 |
| H      | -4.070047               | -1.977772 | -1.806142 |
| C      | -2.148501               | -1.126692 | -1.280284 |
| C      | -2.629842               | 0.244260  | -1.038122 |
| C      | -3.923462               | 0.725932  | -1.203413 |
| H      | -4.718922               | 0.072384  | -1.550900 |
| C      | -4.177803               | 2.068896  | -0.934175 |
| H      | -5.184818               | 2.460113  | -1.064522 |
| C      | -3.164518               | 2.918600  | -0.511701 |
| H      | -3.368370               | 3.967846  | -0.316703 |
| C      | -1.874713               | 2.410456  | -0.354146 |
| C      | -0.669220               | 3.135081  | 0.051881  |
| C      | 0.545248                | 2.393489  | 0.075397  |
| C      | 1.704150                | 3.069822  | 0.451194  |
| H      | 2.658027                | 2.540715  | 0.480526  |
| C      | 1.676973                | 4.423711  | 0.790137  |
| H      | 2.598304                | 4.928166  | 1.077874  |
| C      | 0.481519                | 5.134580  | 0.759867  |
| H      | 0.463018                | 6.189769  | 1.023183  |
| C      | -0.692030               | 4.489937  | 0.390435  |
| H      | -1.625096               | 5.052770  | 0.368455  |
| C      | 2.104821                | -0.135849 | -0.460503 |
| C      | 4.649948                | -0.749528 | -0.595445 |

|   |          |           |           |
|---|----------|-----------|-----------|
| C | 4.934765 | -1.114837 | -2.048291 |
| H | 4.354827 | -1.993655 | -2.355512 |
| H | 6.000874 | -1.349182 | -2.156388 |
| H | 4.694280 | -0.281492 | -2.719014 |
| C | 4.940779 | -1.921490 | 0.334904  |
| H | 4.363380 | -2.808378 | 0.045523  |
| H | 4.707895 | -1.667750 | 1.376504  |
| H | 6.006824 | -2.172169 | 0.274410  |
| C | 5.423845 | 0.494972  | -0.175415 |
| H | 5.188118 | 1.343493  | -0.829320 |
| H | 6.499333 | 0.291848  | -0.247396 |
| H | 5.193130 | 0.772085  | 0.860833  |

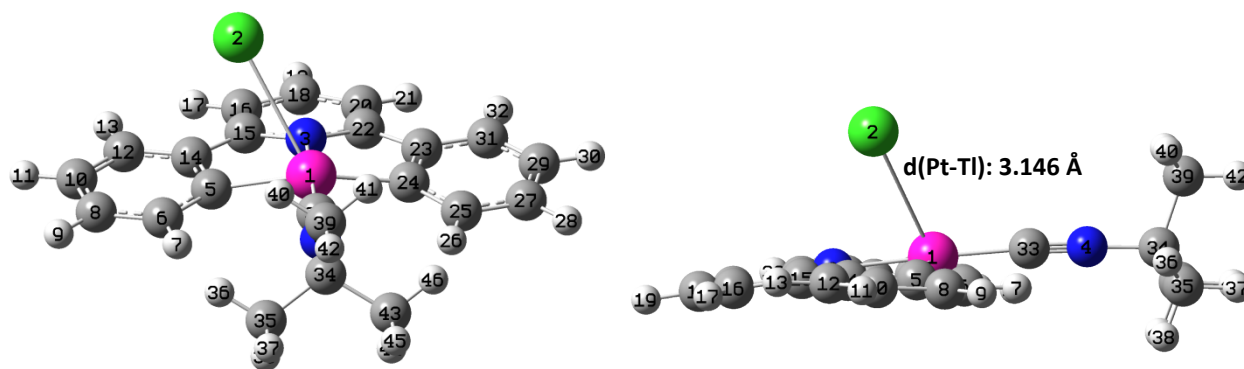Figure S10. DFT-Optimized structure of **4'** in the Excited State,  $T_1$ Table S4. DFT-Optimized coordinates of **4'** in the Excited State,  $T_1$ 

| Center | Coordinates (Angstroms) |           |           |
|--------|-------------------------|-----------|-----------|
|        | X                       | Y         | Z         |
| Pt     | 0.436488                | 0.339954  | -0.348849 |
| Tl     | -1.409798               | -1.209928 | 1.673153  |
| N      | -1.452730               | 1.025910  | -0.632783 |
| N      | 3.375617                | -0.654380 | -0.066798 |
| C      | -0.431123               | -1.267399 | -1.337917 |
| C      | 0.179156                | -2.475120 | -1.709894 |
| H      | 1.263330                | -2.578193 | -1.657693 |
| C      | -0.592329               | -3.546940 | -2.132985 |
| H      | -0.113012               | -4.484804 | -2.407752 |
| C      | -1.988111               | -3.423432 | -2.226039 |
| H      | -2.583424               | -4.267455 | -2.567591 |
| C      | -2.611489               | -2.233465 | -1.898007 |
| H      | -3.695572               | -2.150837 | -1.974522 |
| C      | -1.849480               | -1.131250 | -1.473186 |
| C      | -2.392700               | 0.177740  | -1.160174 |
| C      | -3.680092               | 0.659110  | -1.386344 |
| H      | -4.441254               | 0.001032  | -1.799200 |
| C      | -3.965759               | 1.997639  | -1.134295 |
| H      | -4.964625               | 2.383240  | -1.322313 |
| C      | -2.957398               | 2.862756  | -0.697583 |
| H      | -3.157848               | 3.924081  | -0.571876 |
| C      | -1.683966               | 2.366300  | -0.468488 |
| C      | -0.481299               | 3.102274  | -0.132106 |
| C      | 0.740881                | 2.371678  | -0.197085 |
| C      | 1.962330                | 3.040959  | -0.064744 |
| H      | 2.903778                | 2.507942  | -0.196404 |
| C      | 1.971324                | 4.384921  | 0.281304  |
| H      | 2.919981                | 4.897302  | 0.430998  |
| C      | 0.768130                | 5.086649  | 0.433002  |
| H      | 0.788472                | 6.142817  | 0.692759  |
| C      | -0.447777               | 4.454188  | 0.226349  |
| H      | -1.375773               | 5.016133  | 0.328725  |
| C      | 2.265928                | -0.293412 | -0.135097 |
| C      | 4.766348                | -1.073317 | -0.038873 |

|   |          |           |           |
|---|----------|-----------|-----------|
| C | 4.939351 | -2.152297 | -1.102332 |
| H | 4.305729 | -3.021817 | -0.886639 |
| H | 5.984855 | -2.483928 | -1.111296 |
| H | 4.690004 | -1.768859 | -2.099190 |
| C | 5.067277 | -1.615946 | 1.353603  |
| H | 4.434110 | -2.480324 | 1.587775  |
| H | 4.913409 | -0.846275 | 2.119528  |
| H | 6.115322 | -1.937123 | 1.393844  |
| C | 5.617381 | 0.153283  | -0.349294 |
| H | 5.368483 | 0.566981  | -1.334266 |
| H | 6.675893 | -0.134417 | -0.352488 |
| H | 5.475990 | 0.931969  | 0.410590  |

Table S5. Population Analysis (%) of Frontier MOs in the Ground State for **2** and **4'**

| MO  | eV       |           | Pt       |           | CNC      |           | CN'Bu    |           | Tl        |
|-----|----------|-----------|----------|-----------|----------|-----------|----------|-----------|-----------|
|     | <b>2</b> | <b>4'</b> | <b>2</b> | <b>4'</b> | <b>2</b> | <b>4'</b> | <b>2</b> | <b>4'</b> | <b>4'</b> |
| L+1 | -1.19    | -4.28     | 0        | 1         | 97       | 53        | 3        | 1         | 45        |
| L   | -1.79    | -4.97     | 13       | 16        | 79       | 62        | 8        | 8         | 14        |
| H   | -5.85    | -8.80     | 24       | 14        | 74       | 86        | 2        | 0         | 0         |
| H-1 | -6.22    | -9.30     | 19       | 7         | 72       | 92        | 8        | 1         | 0         |
| H-2 | -6.52    | -9.34     | 8        | 17        | 79       | 77        | 13       | 5         | 1         |
| H-3 | -6.81    | -9.81     | 93       | 5         | 5        | 92        | 2        | 0         | 3         |
| H-4 | -6.83    | -10.02    | 5        | 8         | 94       | 88        | 1        | 1         | 3         |
| H-5 | -7.00    | -10.34    | 11       | 79        | 72       | 10        | 17       | 2         | 9         |
| H-6 | -7.41    | -10.62    | 52       | 52        | 34       | 35        | 14       | 13        | 0         |



Table S6. Selected electronic transitions calculated by TD-DFT for **2** and **4'** in gas phase

| State                                      | $\lambda_{\text{exc}}$<br>(calc.)/nm | o.s.   | Transition (Percentage contribution)               |
|--------------------------------------------|--------------------------------------|--------|----------------------------------------------------|
| <b>[Pt(CNC)(CN'Bu)] (2)</b>                |                                      |        |                                                    |
| S1                                         | 433.5                                | 0.0011 | H → L (98.5%)                                      |
| S2                                         | 386.3                                | 0      | H-1 → L (98.8%)                                    |
| S3                                         | 330.5                                | 0.0999 | H → L+1 (87.1%); H-6 → L (4.4%);<br>H-3 → L (3.9%) |
| S4                                         | 326.4                                | 0.0082 | H-3 → L (70.2%); H-1 → L+1 (2.8%)                  |
| <b>[Pt(CNC)(CN'Bu)TI]<sup>+</sup> (4')</b> |                                      |        |                                                    |
| S1                                         | 452.9                                | 0.0003 | H → L (97.6%)                                      |
| S2                                         | 388.0                                | 0.0007 | H-2 → L (89.1%); H-1 → L (9.4%)                    |
| S3                                         | 353.3                                | 0.1252 | H-1 → L (84.8%); H-2 → L (9.1%)                    |
| S4                                         | 335.9                                | 0.0332 | H → L+1 (88.9%); H-4 → L (2.1%)                    |

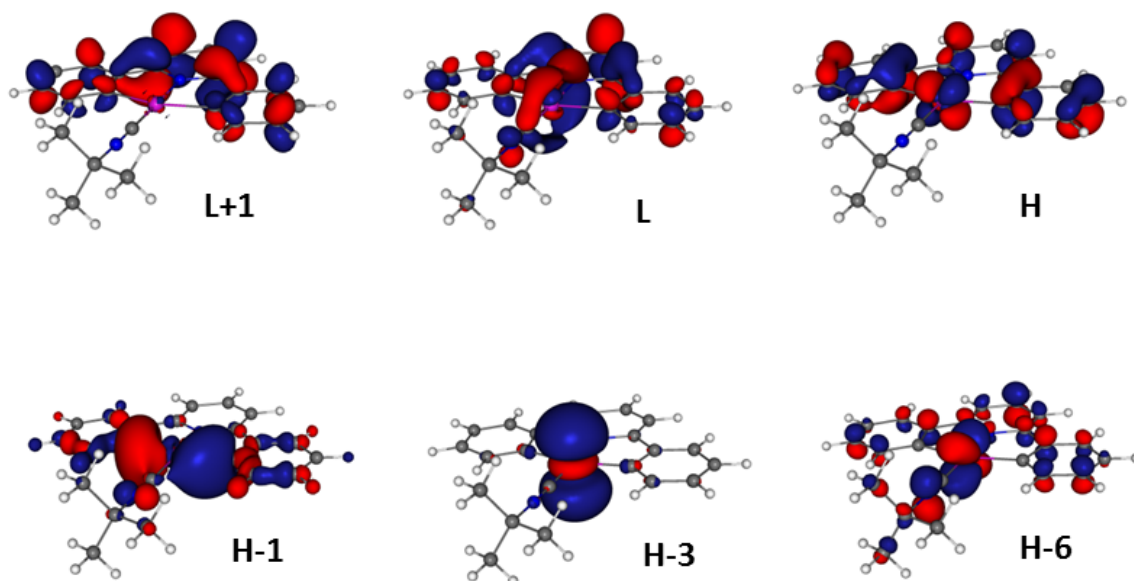

Figure S11. Representative frontier orbitals for 2

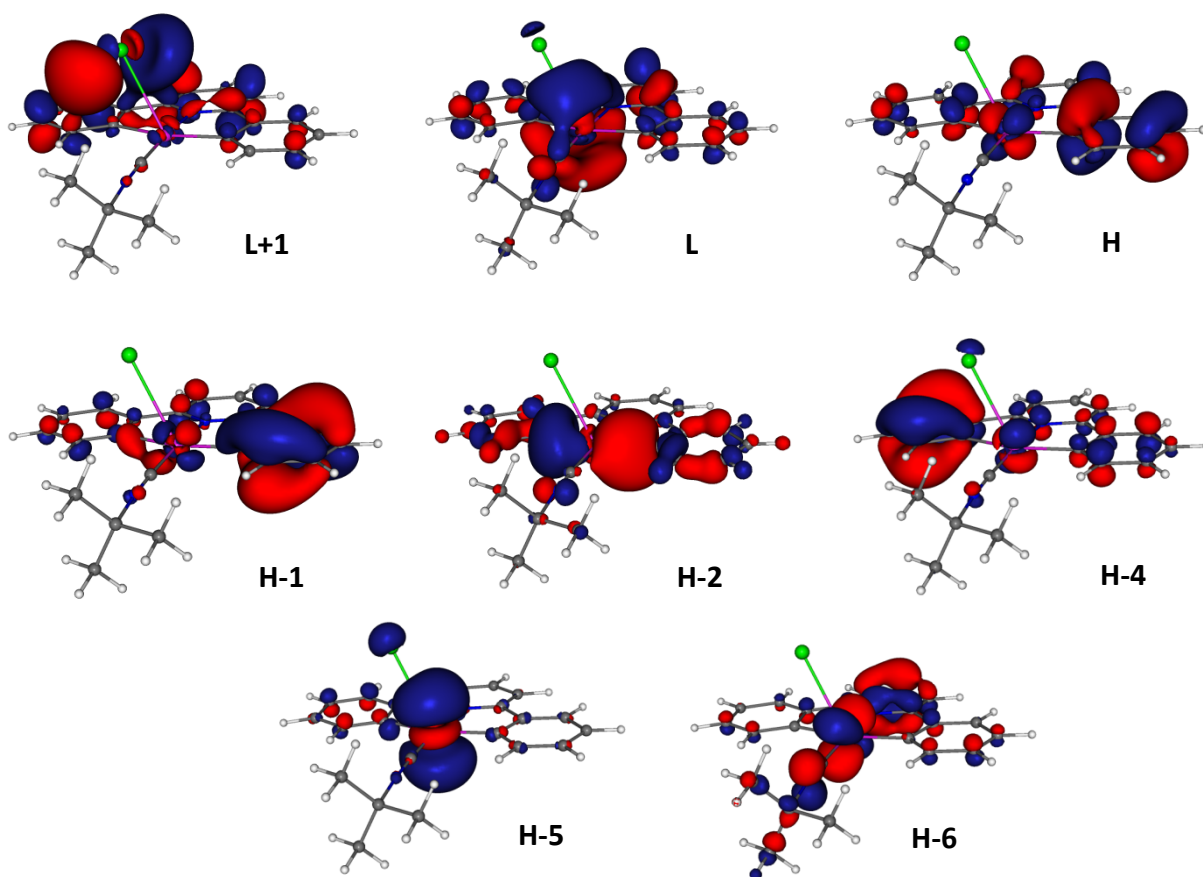

Figure S12. Representative frontier orbitals for 4'

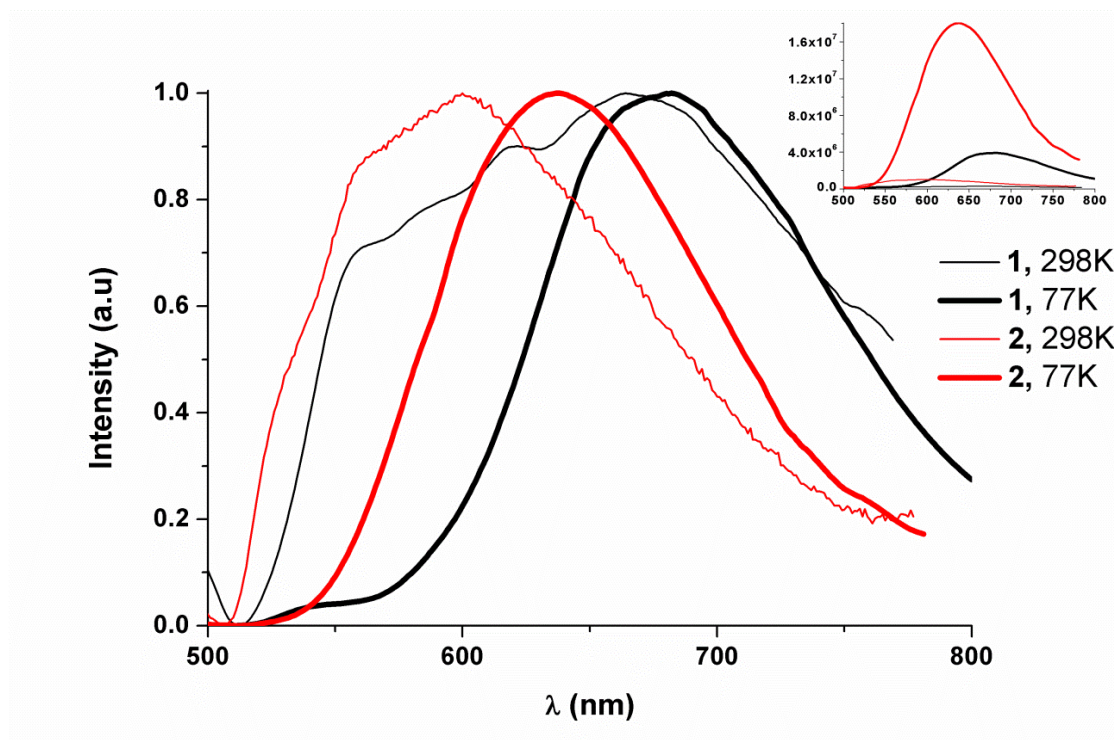

Figure S13. Normalized solid state emission spectra. Inset: Unnormalized spectra

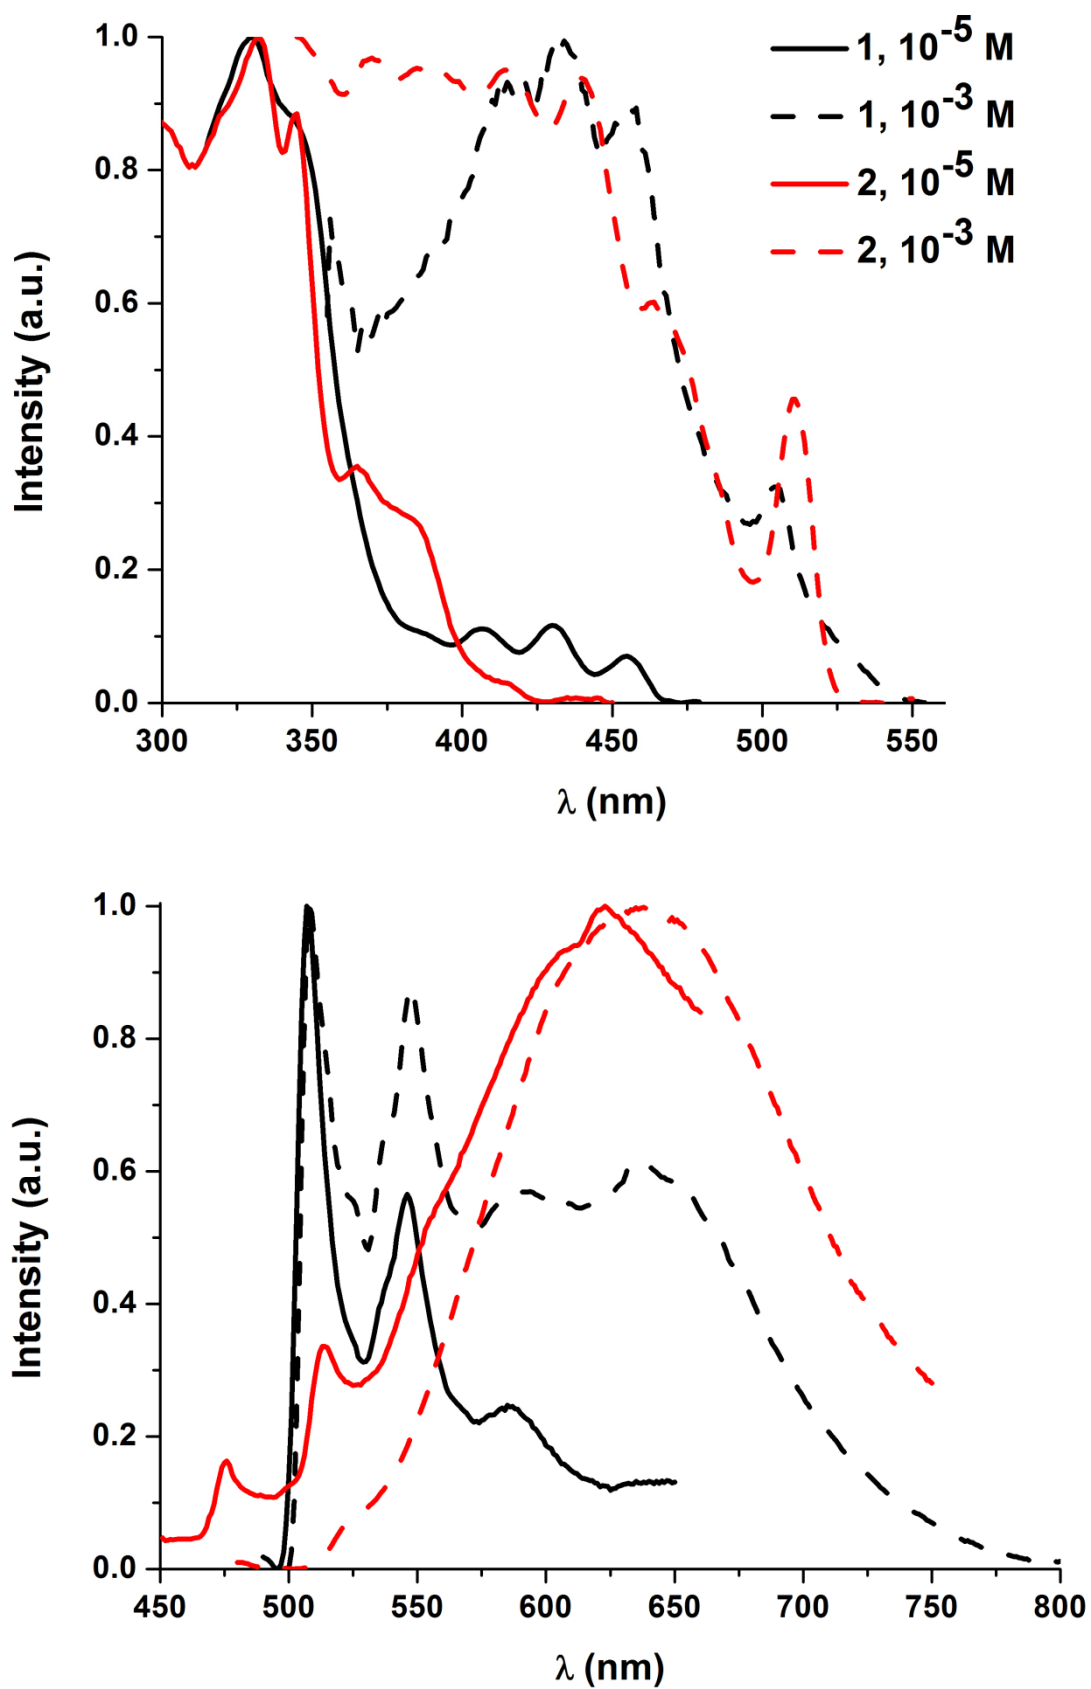

Figure S14. Normalized excitation (above) and emission (below) spectra of **1** and **2**.

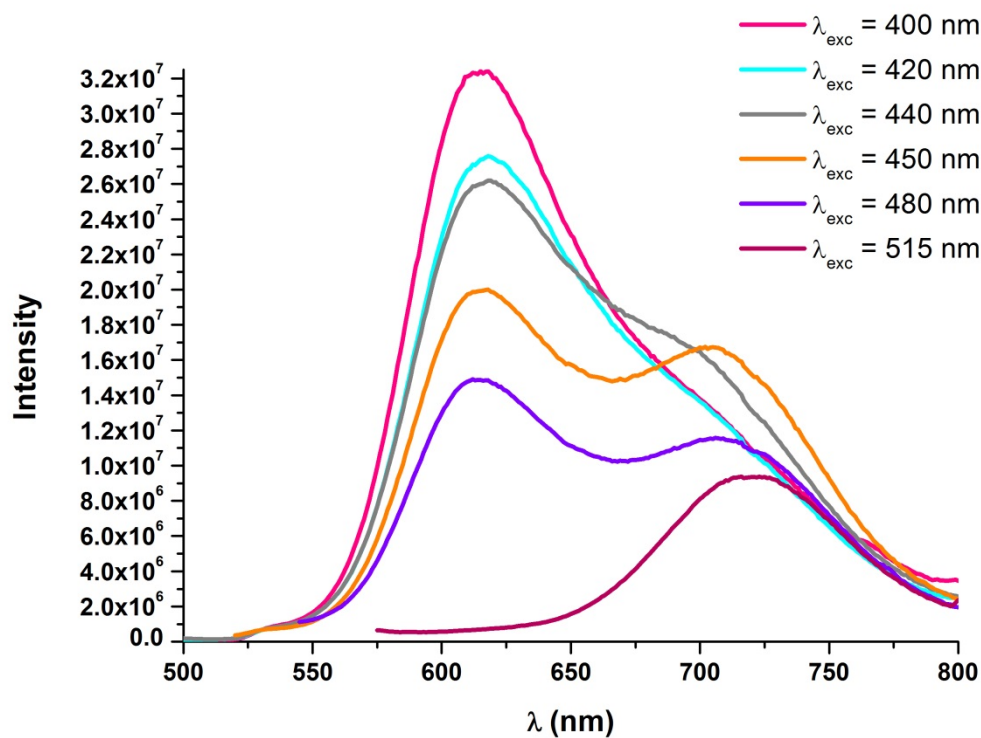

Figure S15. Unnormalized emission spectra of **4** in  $\text{CH}_2\text{Cl}_2$  ( $10^{-3}$  M) at 77 K

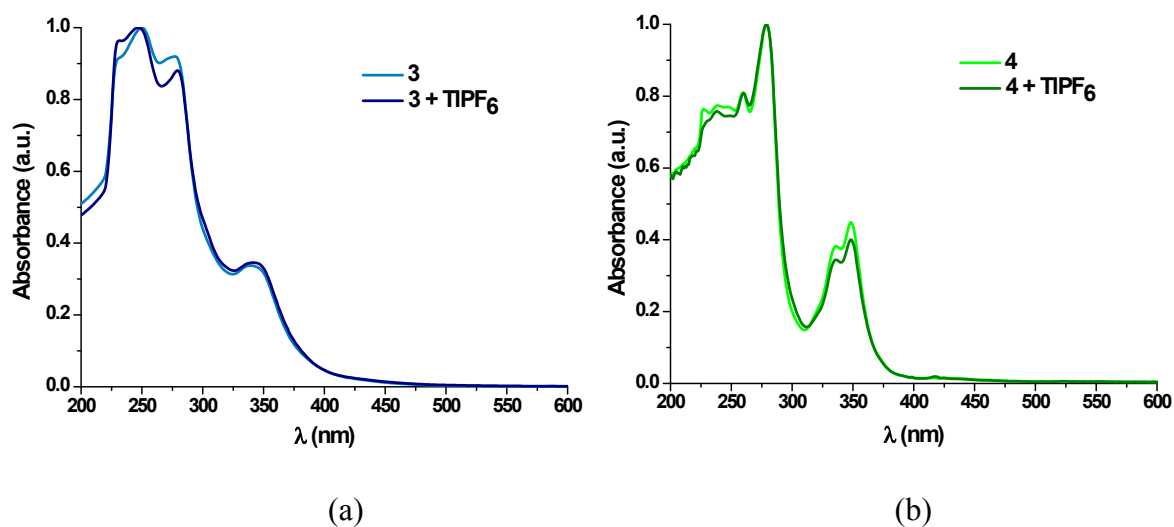

Figure S16. Normalized UV-vis spectra of **3** (a) and **4** (b) in  $\text{CH}_2\text{Cl}_2$  solution upon adding excess of  $\text{TlPF}_6$ .

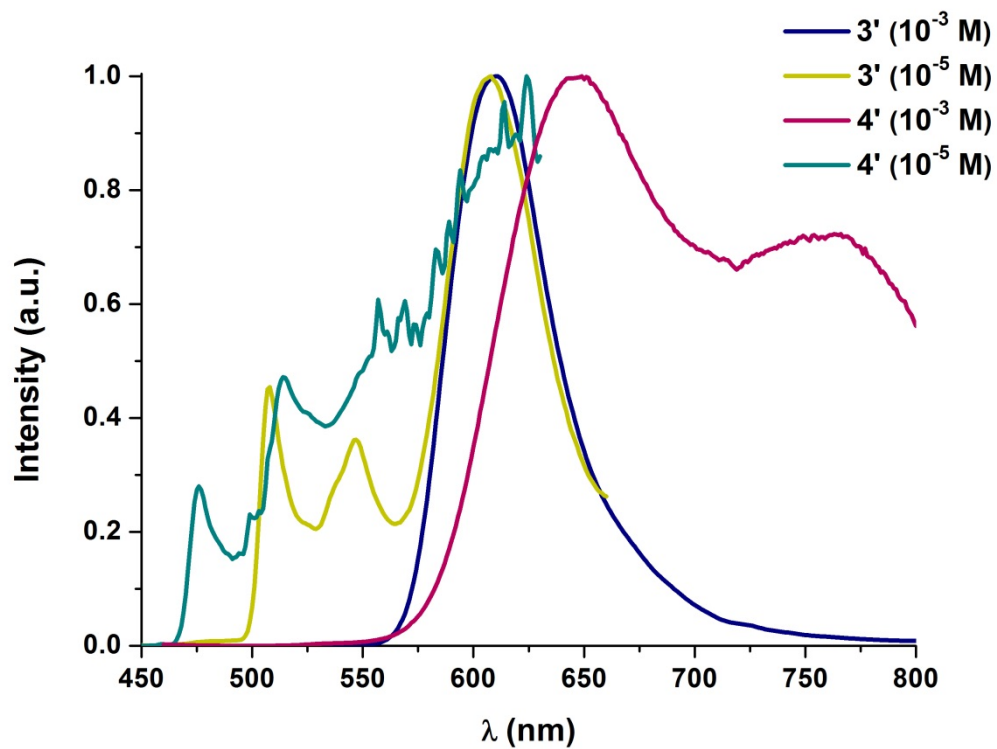

Figure S17. Normalized emission spectra of **3'** (**3** + TlPF<sub>6</sub>) and **4'** (**4** + TlPF<sub>6</sub>) in CH<sub>2</sub>Cl<sub>2</sub> at 77 K
